# Supplementary material for: Keystone Symposia 40th Season: MicroRNAs and Noncoding RNAs in Cancer
Source: Oxford University Press journal article supplement (doi:10.1158/0008-5472.can-11-1679), 2011-09-21
Supplement: 00085472can111679-sup-can_11-1679_appendix_pdf_95k.pdf [file 00085472can111679-sup-can_11-1679_appendix_pdf_95k.pdf]

**Speakers:**

**Danile Allegra**, Daniel Mertens Laboratory, Department of Internal Medicine III, University of Ulm, Ulm, Germany. daniel.mertens@uniklinik-ulm.de

**Victor Ambros**, University of Massachusetts Medical School, Molecular Medicine, 373 Plantation St, Worcester, MA 01605, USA, Victor.Ambros@umassmed.edu

**Stefan Ameres**, Philip D. Zamore Laboratory, Gene Therapy Center, University of Massachusetts Medical School, Worcester, Massachusetts 01655, USA, phillip.zamore@umassmed.edu

**Desire Bonci**, Department of Hematology, Oncology and Molecular Medicine, Istituto Superiore di Sanità, Rome, Italy.

**Robert Blelloch**, The Eli and Edythe Broad Center of Regeneration Medicine and Stem Cell Research, Center for Reproductive Sciences, Department of Urology, University of California San Francisco, San Francisco, CA 94143, USA, blellochr@stemcell.ucsf.edu

**David Corey**, Departments of Pharmacology and Biochemistry, University of Texas Southwestern Medical Center, Dallas, TX 75390-9041, USA, david.corey@utsouthwestern.edu.

**Carlo M. Croce**, Department of Molecular Virology, Immunology and Medical Genetics, the Ohio State University Comprehensive Cancer Center, Columbus, Ohio, USA, carlo.croce@osumc.edu

**Robert B. Darnell**, Howard Hughes Medical Institute, Laboratory of Molecular Neuro-Oncology, The Rockefeller University, New York, NY, USA, Robert.Darnell@rockefeller.edu

**Sarah-Louise Gill**, Royal College of Surgeons in Ireland, 123 St Stephens Green, Dublin 2, Ireland, sarahlouisegill@rcsi.ie

**Gregory J. Hannon**, Cold Spring Harbor Laboratory, Watson School of Biological Sciences, and The Howard Hughes Medical Institute, Cold Spring Harbor, NY, 11724, USA, hannon@cshl.edu

**Curtis Harris**, Laboratory of Human Carcinogenesis NCI, NIH, Bethesda, MD, USA, curtis\_harris@nih.gov

**Mark E. Hatley**, Department of Pediatrics, University of Texas Southwestern Medical Center, Dallas, TX 75390-9148, USA

**Saakari Kauppinen**, Santaris Pharma A/S, Bøge Allé 3, DK-2970 Hørsholm, Denmark, sk@santaris.com

**Scott Lowe**, Cold Spring Harbor Laboratory, Watson School of Biological Sciences, and The Howard Hughes Medical Institute, Cold Spring Harbor, NY, 11724, USA, lowe@cshl.edu

**Muthiah Manoharan**, Alnylam Pharmaceuticals, 300 Third Street, 3rd Floor, Cambridge, MA 02142, USA

**Eric Marcusson**, ISIS Pharmaceuticals, 1896 Rutherford Rd, Carlsbad, CA 92008, USA

**Jean-Christophe Marine**, VIB-K.U.Leuven, Department of Molecular and Developmental Genetics, Laboratory for Molecular Cancer Biology, Leuven, Belgium, jeanchristophe.marine@cme.vib-kuleuven.be

**Pieter Mestdag**, Jo Vandesompele Laboratory, Center for Medical Genetics, Ghent University Hospital, B-9000 Ghent, Belgium, pieter.mestdagh@ugent.be

**Edward Morrissey**, Department of Medicine, University of Pennsylvania, Philadelphia, PA 19104, USA, emorrise@mail.med.upenn.edu

**David M. Patrick**, Eric N. Olson Laboratory, Department of Molecular Biology, University of Texas Southwestern Medical Center, Dallas, Texas 75390-9148, USA, eric.olson@utsouthwestern.edu

**Emily Pugach**, Leonard I. Zon Laboratory, Howard Hughes Medical Institute, Stem Cell Program and Division of Hematology/Oncology, Children's Hospital Boston and Dana Farber Cancer Institute, Harvard Medical School, Boston, Massachusetts 02115, USA.

**John Rinn**, The Broad Institute of Harvard and MIT, Cambridge, MA, USA, jrinn@broadinstitute.org

**Varda Rotter**, Department of Molecular Cell Biology, The Weizmann Institute of Science, Rehovot 76100, Israel, varda.rotter@weizmann.ac.il

**Martine Roussel**, Department of Tumor Cell Biology and Genetics, St. Jude Children's Research Hospital, Memphis, Tennessee, USA, martine.roussel@stjude.org

**Frank Slack**, Department of Molecular, Cellular and Developmental Biology, Yale University, New Haven, CT, USA, frank.slack@yale.edu.

**Deepak Srivastava**, Gladstone Institute of Cardiovascular Disease, University of California San Francisco, San Francisco, California, United States of America, dsrivastava@gladstone.ucsf.edu

**Sohail Tavazoie**, Elizabeth and Vincent Meyer Laboratory of Systems Cancer Biology, Rockefeller University, 1230 York Avenue, New York, NY 10065, USA, Sohail.Tavazoie@rockefeller.edu

**Andrea Ventura**, Memorial Sloan Kettering Cancer Center, New York, NY 10021, USA, venturaa@mskcc.org
